# Supplementary material
Source: Research Square preprint supplement (doi:10.21203/rs.3.rs-9675323/v1)
Supplement: Supplementary file 2 [file f569ba0e3413c30c115e8b99.xlsx]

## Sheet: Sheet1
Supplementary Table S1. Age distribution of second learners post-seminar respondents and third learners by municipality.
Municipality	Group	n	Age data available	Mean age	SD	Age range	Missing age
Osaka	Second learners post-seminar	79	77	40.3	14.9	8–72	2
	Third learners post-transmission	6	6	40.3	13.9	13–50	0
Nishinomiya	Second learners post-seminar	58	46	42.7	12.8	10–61	12
	Third learners post-transmission	7	7	45.9	5.1	40–52	0
Maebashi	Second learners post-seminar	31	0	NA	NA	NA	31
	Third learners post-transmission	10	10	30.1	13.7	21–50	0
Nose	Second learners post-seminar	19	16	44.3	10.9	27–63	3
	Third learners post-transmission	19	19	43.1	14.6	12–63	0
Age values are based on self-reported participant age at the time of the survey. Age values coded as 99 were treated as missing.
